February 2, 2018

Running Title: 2'-C-methyladenosine triphosphate inhibits LRV1 RDRP

# **Concentration of 2'-C-methyladenosine triphosphate by *Leishmania guyanensis* enables specific inhibition of *Leishmania* RNA virus 1 via its RNA polymerase**

**John I. Robinson<sup>†</sup> and Stephen M. Beverley<sup>†,\*</sup>**

From the <sup>†</sup>Dept. of Molecular Microbiology, Washington University School of Medicine, St. Louis, MO 63110 USA.

\*To whom correspondence should be addressed: Department of Molecular Microbiology, Campus Box 8230, Washington University School of Medicine, 660 S. Euclid Ave., St. Louis MO 63110 USA. Telephone 314-747-2630, FAX 314-747-2634, [stephen.beverley@wustl.edu](mailto:stephen.beverley@wustl.edu).

**Keywords:** antiviral agent, computer modeling, double-stranded RNA virus, drug metabolism, *Leishmania*, nucleoside analogue, nucleoside metabolism, parasite metabolism, Totivirus, RNA-dependent RNA polymerase (RDRP).

## Abstract

*Leishmania* is a widespread trypanosomatid protozoan parasite causing significant morbidity and mortality in humans. The endobiont dsRNA virus *Leishmania* RNA virus 1 (LRV1) chronically infects some strains, where it increases parasite numbers and virulence in murine leishmaniasis models, and correlates with increased treatment failure in human disease. Previously, we reported that 2'-C-methyladenosine (2CMA) potently inhibited LRV1 in *Leishmania guyanensis* (Lgy) and *L. braziliensis*, leading to viral eradication at concentrations above 10  $\mu$ M. Here we probed the cellular mechanisms of 2CMA inhibition, involving metabolism, accumulation and inhibition of the viral RNA dependent RNA polymerase (RDRP). Activation to 2CMA triphosphate (2CMA-TP) was required, as 2CMA showed no inhibition of RDRP activity from virions purified on cesium chloride gradients. In contrast, 2CMA-TP showed IC50s ranging from 150 to 910  $\mu$ M, depending on the CsCl density of the virion (empty, ssRNA- and dsRNA-containing). Lgy parasites incubated *in vitro* with 10  $\mu$ M 2CMA accumulated 2CMA-TP to 410  $\mu$ M, greater than the most sensitive RDRP IC50 measured. Quantitative modeling showed good agreement between the degree of LRV1 RDRP inhibition and LRV1 levels. These results establish that 2CMA activity is due to its conversion to 2CMA-TP, which accumulates to levels that inhibit RDRP and cause LRV1 loss. This attests to the impact of the *Leishmania* purine uptake and metabolism pathways, which allow even a weak RDRP inhibitor to effectively eradicate LRV1 at micromolar concentrations. Future RDRP inhibitors with increased potency may have potential therapeutic applications for ameliorating the increased *Leishmania* pathogenicity conferred by LRV1.

## Introduction

The neglected tropical disease leishmaniasis is caused by species of the genus *Leishmania*, which are single-celled eukaryotic parasites transmitted by phlebotomine sand flies (1,2). Leishmaniasis occurs in many regions of the world, with more than 12 million cases and more than 1.7 billion people at risk (1,3). Three clinical presentations are most common: mild, self-healing cutaneous lesions (CL), fatal visceral disease, and disfiguring metastatic forms such as mucocutaneous leishmaniasis (MCL) (4). The factors determining disease progression and responsiveness to treatment are unclear, but are thought to be both host- and pathogen-derived. (5,6).

Many isolates of *Leishmania* within the subgenus *Viannia*, including *L. braziliensis* (Lbr) and *L. guyanensis* (Lgy), bear *Leishmaniavirus*, a single-segmented dsRNA totivirus known as *Leishmania* RNA virus 1 (LRV1)<sup>1</sup> (5,7-9). Like most other Totivirus species, LRV1 is neither shed nor infectious and is inherited vertically (10,11); indeed, phylogenetic evidence suggests that LRV1 strains have persisted and co-evolved with their *Leishmania* hosts over millions of years (10).

Previous work has established that mice infected with parasites containing the endobiont LRV1 exhibit greater pathology, higher parasite numbers, and increased metastasis (12,13). These studies benefited from the availability of isogenic LRV1+ or LRV1- lines, generated spontaneously or by defined methods such as RNA interference or antiviral drug treatment (14-16).

The role of LRV1 in human leishmaniasis has been more challenging to establish definitively. When comparing rates of CL and MCL, some studies find that LRV1+ strains generate more MCL (17-19), while others do not (20,21). These discrepant findings may be explained by other parasite or host factors known to contribute to MCL pathology (13,22,23). Furthermore,

<sup>1</sup> The abbreviations used are: *Leishmania guyanensis* (Lgy), *Leishmania braziliensis* (Lbr), *Leishmania* RNA virus 1 (LRV1), 2'-C-methyladenosine (2CMA), 2'-C-methyladenosine triphosphate (2CMA-TP), RNA-dependent RNA polymerase (RDRP), 7-deaza-2'-C-methyladenosine (7d2CMA), cesium chloride (CsCl), low-density (LD), medium density (MD), high density (HD), phosphate buffered saline (PBS), single stranded RNA (ssRNA), double stranded RNA (dsRNA).

differences in the severity of disease are not always accurately captured by binary categorization as CL or MCL. Moreover, co-infections with viruses inducing Type I interferon responses exacerbate *Lgy* pathology and metastasis (24,25), potentially obscuring the contributions of LRV1. Importantly, the presence of LRV1 in clinical isolates of *Lbr* or *Lgy* correlates with drug-treatment failure and relapses (18,20), which could be explained by the increased parasite numbers or altered host responses predicted from animal models (12,13,26). Overall, there is good reason to postulate a role for LRV1 in increasing disease severity in human leishmaniasis (13), although many questions remain.

LRV1 follows a typical totivirus life cycle where the dsRNA viral genome encodes two large overlapping reading frames, the capsid and RNA-dependent RNA polymerase (RDRP) (Fig. 1A). First, the dsRNA genome is transcribed by the viral RDRP into positive-sense ssRNA. As in many totiviruses, the RDRP is translated via a +1 frameshift, generating a capsid-RDRP fusion (27-29). The capsid monomers then self-assemble into immature virions (30), incorporating the positive-sense ssRNA transcript, which the RDRP then replicates into the mature dsRNA genome.

Vaccination of mice using the LRV1 capsid results in significant protection against LRV1+ *Lgy* (31), suggesting that therapies targeting LRV1 specifically might aid in reducing disease pathology. Previously, we reasoned that the powerful nucleoside and nucleobase salvage pathways of *Leishmania* might enhance the efficacy of nucleosides analogs targeting the viral RDRP (15,32). Accordingly, screening a small library of antiviral nucleosides identified two closely-related adenosine analogs, 2'-C-methyl adenosine (2CMA) and 7-deaza-2'-C-methyl adenosine (7d2CMA) (Fig. 1B), which specifically inhibited LRV1 replication in cultured *Leishmania* cells (15). These compounds exhibited EC50s of 3-5  $\mu$ M for viral inhibition, contrasting with much greater EC50s for the parasites themselves. The active compounds rapidly eradicated LRV1 when tested at concentrations above 10  $\mu$ M, allowing us to readily create isogenic LRV1- lines (15).

Importantly, these were the first studies showing specific inhibition of any totivirus. The mechanism of anti-LRV1 activity was postulated

to be through direct inhibition of the LRV1 RDRP by the triphosphorylated form of 2CMA. Here we provide support for this hypothesis, although the potency of 2CMA-TP for viral inhibition was unexpectedly weak. Remarkably, viral inhibition was accomplished through hyper-accumulation and retention of 2CMA-TP, arising from the powerful uptake and metabolic salvage pathways of these purine auxotrophs (32). These findings have significant implications for future efforts aimed towards developing new and more potent *Leishmania* virus inhibitors.

## Results

**Purification and separation of virion populations on CsCl gradients.** RDRP assays were carried out with *Lgy* strain M4147 LRV1 virions purified by CsCl equilibrium gradient centrifugation (7,33). After fractionation, virions were detected and quantified by their reactivity with an anti-capsid antibody. We reproducibly observed three overlapping 'peaks', designated low-, medium-, and high-density (LD, MD and HD) (Fig. 2). In previous studies of the yeast L-A Totivirus, similar peaks were shown to correspond to virions that were primarily 'empty' or contained ssRNA or dsRNA, respectively (34,35). The densities of the *Lgy* LRV1 LD, MD and HD peaks were 1.29, 1.36 and 1.41 g/mL, in good agreement with the densities of L-A virus particles bearing ssRNA- and dsRNA- (1.31 and 1.41 g/mL, respectively) (36). Preliminary data from S1 nuclease digestion of viral RNA from these fractions were consistent with these assignments<sup>2</sup>.

**In vitro assay of LRV1 RDRP activity.** To measure RDRP activity, purified virions were allowed to incorporate [ $\alpha$ -<sup>32</sup>P]UTP in the presence of the other three nucleoside triphosphates for 1 hr, a time sufficient for one round of viral genome replication (33). RNA was purified and separated by native gel electrophoresis, and the products were visualized and quantified. Two products were always found: one about 5 kb, presumably corresponding to the full-length LRV1 genome, and smaller, heterogeneous products ranging from 0.1 – 0.5 kb, which we considered abortive transcripts (Fig. 3A). Neither extending the incubation time nor increasing the concentration of

<sup>2</sup> J.I.R., unpublished observations.

UTP significantly altered the profile obtained<sup>2</sup>. Importantly, neither full-length nor small products were produced by corresponding preparations from LRV1-negative parasites (Fig. 3B).

**2CMA-TP specifically inhibits viral RDRP activity.** Incubation of the three LRV1 fractions with 2CMA-TP reduced synthesis of both the full-length and small RDRP products (Figs. 3 - 5). The synthesis of each product was quantitated and normalized to that obtained with drug-free controls. IC50s were calculated by fitting the inhibition data with a logistic dose-response curve (Table 1). These ranged from 150  $\mu$ M for full-length product synthesis by LD virions to 910  $\mu$ M for small products synthesized by HD virions (Table 1, Figs. 3, 4). These IC50s were unexpectedly high, greatly exceeding the extracellular concentration of 2CMA shown previously to cause 50% inhibition of LRV1 abundance ( $\sim$ 3  $\mu$ M) (15). This did not arise artificially from 2CMA-TP degradation during the assay, as HPLC tests of RDRP reactions showed only  $3.7 \pm 0.6\%$  ( $n = 3$ ) loss of 2CMA-TP.

As anticipated, 2CMA did not measurably inhibit RDRP activity when tested at concentrations up to 1000  $\mu$ M (Fig. 5). Similarly, dATP, which lacks both the 2'-hydroxyl and methyl groups of 2CMA (Fig. 1B), failed to inhibit RDRP activity at the highest concentration tested (600  $\mu$ M; Fig. 5); nor in limited tests did 600-1000  $\mu$ M TTP inhibit<sup>2</sup>. These data show that high concentration of a non-substrate nucleoside triphosphate do not inhibit RDRP activity nonspecifically. Together, these data suggest that despite its relatively low potency, under these assay conditions 2CMA-TP inhibition of LRV1 RDRP activity was specific.

**2CMA activation to 2CMA-TP within parasites.** To account for the relative sensitivity of *Lgy* LRV1 within cells to 2CMA treatment compared to the insensitivity of LRV1 RDRP activity to inhibition by 2CMA-TP, we hypothesized that parasites must acquire and activate 2CMA, accumulating high 2CMA-TP concentrations. We developed an HPLC protocol capable of resolving synthetic 2CMA-TP from natural ribonucleotides and the internal standard, dGTP (Fig. 6A-B; a small peak presumed to be 2CMA-DP was also observed). Although dGTP occurs naturally, its intracellular concentration of

approximately 5  $\mu$ M is well below the limit of detection for this assay and thus does not interfere with its use for this purpose.(37). Standard mixtures were then used to generate a calibration curve relating peak area to 2CMA-TP amount.

We next evaluated several protocols for extracting parasite nucleotides and determined that extraction with 1:1 acetonitrile:water performed best, as judged by recovery of the added dGTP standard (Experimental Procedures). We then compared the nucleotide profiles of LRV1+ *Lgy* grown in the presence or absence of 10  $\mu$ M extracellular 2CMA for 20 hours, a time corresponding to more than two rounds of parasite replication. Under these conditions, we observed a peak co-eluting with synthetic 2CMA-TP that was absent from untreated parasites (Fig. 6B). This established the parasite's capacity to activate 2CMA to 2CMA-TP.

### Time and external 2CMA concentration dependence of 2CMA-TP accumulation.

*Leishmania* cell volumes vary somewhat depending on the culture's growth phase (38). To calculate the intracellular 2CMA-TP concentration, we therefore determined the average volume of *Lgy* parasites under our assay conditions. In logarithmic growth phase, parasite volumes averaged about 23 fL (Experimental Procedures).

We measured the intracellular concentration of 2CMA-TP as a function of time of incubation with 10  $\mu$ M external 2CMA. Within 1.5 hours, 2CMA-TP levels had risen to concentrations comparable to the minimal RDRP IC50 levels (Fig. 7A), and had reached maximal levels by 8 hours.

We then measured the intracellular 2CMA-TP levels following growth in varying levels of 2CMA for 20 hours (Fig. 7B). The concentrations were chosen to span a range from non-inhibitory (1  $\mu$ M) to that sufficient to eradicate LRV1 entirely (10  $\mu$ M) (15). Over this range of concentrations, internal 2CMA-TP levels exceeded external 2CMA concentrations by 40- to 80-fold (Fig. 7B).

When propagated in the sub-inhibitory dose of 2CMA (1  $\mu$ M), the intracellular 2CMA-TP concentration was  $78 \pm 9$   $\mu$ M (Fig. 7B,  $n=4$ ), well below the minimal IC50 for RDRP inhibition (150  $\mu$ M for full-length products from LD virions; Table 1). When treated with 3  $\mu$ M external



2CMA—the EC<sub>50</sub> for LRV1 inhibition— intracellular 2CMA-TP levels rose to  $152 \pm 43 \mu\text{M}$  ( $n = 4$ ), comparable to the minimal RDRP IC<sub>50</sub>. Finally, cells propagated in  $10 \mu\text{M}$  external 2CMA, reached an intracellular 2CMA-TP concentration of  $410 \pm 110 \mu\text{M}$  ( $n=4$ ) (Fig. 7B), well in excess of the minimum IC<sub>50</sub> for RDRP inhibition.

Thus, with increasing external 2CMA, the steady-state levels of intracellular 2CMA-TP rose progressively to values exceeding the minimal RDRP IC<sub>50</sub>, which in turn corresponded reasonably well to the observed effects on LRV1 inhibition.

**Parasites retain 2CMA-TP for an extended period following 2CMA removal.** Once phosphorylated by cells, some nucleoside analogs are retained for an extended period as triphosphates, thereby contributing significantly to drug efficacy (39). To assess this, *Lgy* parasites were incubated for 20 hours in  $10 \mu\text{M}$  2CMA, washed, and resuspended in drug-free medium, after which intracellular 2CMA-TP levels were measured and corrected for parasite replication (Fig. 7C). Even after 8 hours, 2CMA-TP levels remained at or above the minimal RDRP IC<sub>50</sub>. Indeed, the persistence of intracellular parasite 2CMA-TP greatly exceeded that of serum 2CMA measured in mammalian models (40).

**A quantitative simulation of RDRP and virus inhibition.** We asked whether a simple computational model using the relative rates of parasite and viral replication under conditions of drug treatment could quantitatively simulate the experimental data above. We developed a model employing Gibson and Bruck's next-reaction modification to Gillespie's stochastic simulation algorithm (41), which directly simulates the occurrence of individual events over time by picking the next event-time from an associated probability distribution (Experimental Procedures; Supplemental File 2).

In this model, the relevant parameters were parasite and virus replication rates. We used the experimentally-measured parasite population doubling time of 7.5 hours and assumed that in the absence of drug pressure the relative parasite and virus replication rates were identical. Simulations began with an initial population of 1000 cells, a number large enough that repeated simulations

deviated <1% from each other. The simulated parasites each initially contained 16 LRV1 particles, consistent with prior measurements of virus numbers (15). Using these conditions, the simulation correctly maintained the LRV1 population over time at an average of 16 virions per parasite in the absence of drug pressure (Fig. 8).

The effect of 2CMA was then modeled by adjusting the ratio of LRV1 to parasite replication rates ( $R_V:R_P$ ). Importantly, at concentrations relevant to these studies, 2CMA has little effect on the growth of the parasite itself (15). After setting  $R_V:R_P$  to 1:2, 1:3, or 1:4, LRV1 was now rapidly lost (Fig. 8). Comparison of the simulations with  $R_V:R_P$  of 1:3 or 1:4 showed close correspondence with the experimentally-measured rate of LRV1 loss under 2CMA inhibition (15) (Fig. 8; solid lines, simulation; dashed lines, experimental).

To compare these predictions with our experimental data on parasite replication and RDRP inhibition, we made an initial simplifying assumption that the primary determinant of LRV1 replication would be the lowest RDRP 2CMA-TP IC<sub>50</sub> ( $150 \mu\text{M}$ , for full-length product synthesis by LD virions; Table 1; Fig. 4A). Since RDRP inhibition would reduce viral RNA levels within infected cells, RDRP activity would likely become rate-limiting at high 2CMA-TP concentrations. We then calculated the 2CMA-TP concentrations required to give  $R_V:R_P$  of 1:2, 1:3 or 1:4. Importantly, at  $10 \mu\text{M}$  extracellular 2CMA, intracellular 2CMA-TP is  $410 \mu\text{M}$ , and  $R_V:R_P$  was calculated to be ~1:3 (Fig. 8). Thus the simulation and experimental data are in good agreement about the quantitative and qualitative aspects of RDRP inhibition and viral loss. This suggests that despite the potential complexity of viral replication, the system behaves as though RDRP activity is rate limiting for viral replication and that our *in vitro* measurements of 2CMA-TP inhibition are consistent with our *in vivo* measurements of viral elimination time courses.

## Discussion

Previously, we showed that two 2'-C-methyl-adenosine analogs selectively inhibit the replication of *Lgy* and *Lbr* LRV1 but have significantly less effect on the parasite growth rates. These compounds were the first such

inhibitors to be described for any totivirus (15). There, the mechanism of action was presumed but not shown to follow the classic antiviral nucleoside paradigm of uptake, conversion to the nucleoside triphosphate, and inhibition of the viral RDRP. In this study, we provide evidence that this is in fact the case for *Lgy* LRV1 inhibition following 2CMA treatment. Importantly, the ability of the parasite to accumulate high levels of 2CMA-TP (Fig. 7) was strongly correlated with viral elimination at concentrations above 3  $\mu$ M external 2CMA (15). These data provide key information for the design of other improved LRV1 inhibitors with greater potential for use as therapeutics.

We first established an assay for RDRP activity from purified virions, separated on CsCl gradients to obtain virions in different stages of maturation (Figs 1-3). RDRP activity was dependent on the presence of LRV1 and yielded two major products, corresponding to the full length viral genome as well as a heterogeneous collection of small and presumably abortive transcripts (Fig. 3). Quantitative analysis showed that the IC<sub>50</sub>s for full-length product synthesis were somewhat lower than those measured for small product synthesis ( $p < 0.05$ ), and significantly less for low-density virions than high- ( $p < 0.001$ ; Table 1). These may reflect the intrinsic sensitivities of the RDRP activity within mature and immature viral particles, perhaps related to the distinct transcriptase/positive-strand (mRNA) and replicase/negative-strand synthesis activities. This is the first such report for Totiviruses, for which antiviral drugs have only recently been reported (15). Differential effects on replicase versus transcriptase activity have also been seen in reoviruses, where ribavirin triphosphate inhibits replicase but not transcriptase activity (42). Our studies were constrained by two factors: first, the virion-based RDRP assay depends on native RNA substrates, and second, the virion-containing fractions used were not homogeneous (Fig. 2). This prevented clean separation of RDRP transcription and replication activities, and precluded the use of tightly-controlled initiation and elongation assays, required for determination of the precise mechanism of RDRP inhibition by 2CMA-TP. Future studies with purified RDRP and defined

RNA substrates will be required to fully elucidate the mechanism of action of 2CMA-TP.

2CMA was completely inactive for RDRP inhibition, as were dATP or TTP, structurally-similar non-substrate nucleoside triphosphates (Fig. 5). Activation to triphosphate form is common and often rate limiting amongst nucleoside analog drugs (43-45). It was also shown previously that the triphosphate form of 2CMA, but not the analog itself, is active against the Hepatitis C virus RNA polymerase (46).

Despite the ability of 2CMA to clear LRV1 from parasites grown in micromolar concentrations of drug (15), 2CMA-TP inhibition of LRV1 RDRP activity was not very potent, with IC<sub>50</sub>s ranging upwards of 150  $\mu$ M (Table 1). We resolved this discrepancy by showing that the parasites avidly scavenged 2CMA from the medium and efficiently convert it to the active triphosphate form (Fig. 6), reaching intracellular 2CMA-TP concentrations more than 40-fold that of extracellular 2CMA (Fig. 7). This likely reflects the fact that as purine auxotrophs, *Leishmania* parasites must avidly scavenge all naturally occurring purines from their environment, through a combination of powerful transporters and metabolic interconversions (32). One particularly important step for 2CMA and related inhibitors may be adenosine kinase (47,48), which may mediate the initial and often rate-limiting phosphorylation of antiviral nucleosides (44,49). Strong accumulation of toxic anti-leishmanial purines has also been noted in earlier studies (50,51). Thus the salvage pathway converts 2CMA into a potent tool for eliminating the virus.

Importantly, the accumulated levels of intracellular 2CMA-TP closely matched the consequences of RDRP inhibition and LRV1 loss. When grown in 10  $\mu$ M external 2CMA, internal 2CMA-TP levels greater than 400  $\mu$ M were attained, well over the minimal LRV1 RDRP IC<sub>50</sub> (Table 1). In contrast, at 1  $\mu$ M external 2CMA, internal 2CMA-TP concentrations were only 80  $\mu$ M, well below that needed for RDRP inhibition, and little effect was seen on LRV1 levels (15). These experimental observations were corroborated using Gillespie (52) simulation to model LRV1 loss (Fig. 8). Our studies did not examine other potential 2CMA-TP targets such as the capsid endonuclease (53-57) and could not

discern the exact mechanism of RDRP inhibition by 2CMA-TP. Nevertheless, these analyses show that the elimination of LRV1 by 2CMA can be largely explained through the direct inhibition of LRV1 RDRP activity by 2CMA-TP.

Previously, we proposed that treatments targeting LRV1 could be used therapeutically to ameliorate the severity of *Lgy* and *Lbr* infections (15,31). 2CMA-TP accumulates rapidly to inhibitory concentrations within 1-2 hr of 2CMA exposure, and once formed, is retained at inhibitory concentrations for >8 hr (Fig. 7). This suggests that a relatively short period of treatment may lead to a prolonged period of viral inhibition. In animal models, 2CMA has a short serum half-life, which precludes its use in humans or animals. The serum half-life of 7d2CMA, however, is markedly longer (0.3 vs. 1.6 hr (58)). Interestingly, 7d2CMA shows an EC<sub>50</sub> against Zika virus in cultured mammalian cells of about 10  $\mu$ M, and dosing regimens have shown significant inhibition in animal models (59,60). This suggests it might likewise be possible to achieve inhibition of LRV1 *in vivo* using 7d2CMA.

In future work, one priority will be the development of anti-LRV1 agents with improved potency. Preliminary studies expressing a promiscuous HSV TK gene within *Leishmania* did not increase the spectrum of activity significantly for those analogs tested from our previous study<sup>2</sup> (15), suggesting that the lack of activity may reflect failure to inhibit the LRV1 RDRP itself rather than insufficient activation to triphosphates. Similarly, we found that several immucillins shown previously to inhibit *Leishmania* nucleoside hydrolases (Immucillin A, DADMe-Immucillin A, Immucillin H, and DADMe-Immucillin H; (61,62)) had little effect on the potency of 2CMA<sup>2</sup>. Although nucleoside analogs themselves, these immucillins showed no inhibition of LRV1 levels when tested at concentrations up to 100  $\mu$ M<sup>2</sup>.

Additional priorities will be identifying compounds with more favorable pharmacokinetics and minimal toxicity against the mammalian host cell. Thus, efforts focusing on improved potency against the RDRP activity itself may prove most fruitful. Our work now sets the stage for future studies exploring the possibility that improved LRV1-targeted therapies may ameliorate the pathology of those *Leishmania* species and strains that bear this fascinating virus.

## Experimental Procedures

**Parasite strains and media.** Luciferase-expressing isogenic clones of *L. guyanensis* strain M4147 (MHOM/BR/75/M4147) were utilized for these studies. LRV1+ clone LgyM4147/SSU:IR2SAT-LUC(b)c3 and LRV1- clone LgyM4147/pX63HYG/SSU:IR2SAT-LUC(b)c4 were described previously (63). For some experiments LgyM4147/LRV1+ line expressing GFP+ [LgyM4147/SSU:IR2SAT-LUC(b)c3/SSU:IR3HYG-GFP+(b)] was used (provided by E. Brettmann). Schneider's medium (Sigma Aldrich, St. Louis, MO) was prepared following the manufacturer's instructions, supplemented with 10% heat-inactivated FBS, 0.76 mM hemin, 2  $\mu$ g/mL biotin, 50 U/mL penicillin, and 50  $\mu$ g/mL streptomycin, and adjusted to a final pH of 6.5. M199 medium was prepared with 2% heat-inactivated FBS, 2% filter-sterilized human urine, 0.1 mM adenine, 1  $\mu$ g/mL biotin, 5  $\mu$ g/mL hemin, 2  $\mu$ g/mL biotin, 50 U/mL penicillin, 50  $\mu$ g/mL streptomycin, and 40 mM HEPES, pH 7.4 (64). No significant differences were observed in the properties of virus preparations from either medium. Cells were counted using either a hemocytometer or a Coulter counter (Becton Dickinson).

**Purification and fraction of virions on CsCl gradients.** Parasites were grown to early stationary phase in M199 or Schneider's medium ( $3 \times 10^7$  or  $9 \times 10^7$  cells/mL, respectively).  $1 \times 10^{10}$  cells were pelleted at  $2200 \times g$  for 15 min at 4°C and washed twice with 10 mL ice-cold TMN buffer (100 mM Tris, pH 7.5; 50 mM MgCl<sub>2</sub>; 1.5 M NaCl). Cells were then resuspended in 1 mL ice-cold lysis buffer (TMN buffer plus 1 mM DTT, 1× Complete protease inhibitor cocktail (Roche) and 1% (v/v) Triton X-100), homogenized by pipetting 10-12 times with a 1-mL micropipette, and incubated on ice for 20-30 minutes. Lysis was completed by passing the mixture repeatedly through a 27G needle, after which it was clarified by centrifugation at  $15,000 \times g$  for 10 minutes at 4°C. Density gradients were prepared by thoroughly mixing the clarified lysates with enough 10×TMN buffer, saturated CsCl, and distilled water to make 12 mL of solution at a final density of 1.35 g/mL (2.82 M CsCl). Gradients were spun in a pre-chilled SW41Ti rotor (Beckman) at 32,000 rpm and 4°C

for approximately 72 hours. Twelve 1-mL fractions were recovered immediately from each gradient using a density gradient fractionator (ISCO).

The distribution of capsid protein across each gradient was determined by binding of 50  $\mu$ L aliquots of each fraction to a nitrocellulose membrane using a Mini-fold II Slot-Blot System (Schleicher & Schuell, Keane, NH). The membrane was incubated on a roller with blocking buffer (2% non-fat powdered milk in PBS) for 1 hour, then stained with 1:2500 rabbit anti-capsid antibody (65) in blocking buffer plus 0.2% TWEEN-20 (TWEEN buffer) for another hour. The membrane was then washed 3 times for 5 minutes in 1 $\times$ PBS plus 0.1% TWEEN-20 (PBST). Membranes were next incubated in TWEEN buffer for 1 hour with 1:10,000 goat anti-rabbit antibodies conjugated to IRDye 680 (LiCor Biosciences). Finally, the membranes were washed 3 $\times$  in PBST and once in PBS. Membranes were scanned with an Odyssey Infrared Imaging System (LiCor Biosciences). The density of each fraction was measured by taking its refractive index with an Abbe refractometer (Bausch and Lomb) and converting to density using published formulas (66). Gradient fractions of interest (Fig. 2) were dialyzed twice against 1 $\times$ TMN and once in 1 $\times$ TMN plus 20% glycerol (4 $^{\circ}$  C), reaching CsCl concentrations less than 2  $\mu$ M. Fractions were flash frozen and stored at -80 $^{\circ}$ C prior to use.

**RDRP assay.** RDRP activity of purified virions was measured using an [ $\alpha$ - $^{32}$ P]UTP incorporation assay described previously (33). Briefly, 20  $\mu$ L reactions contained 10 mM Tris-HCl (pH 7.5); 150 mM NaCl; 3 mM MgCl<sub>2</sub>; 4 mM DTT; 50  $\mu$ M each ATP, CTP, and GTP; 20  $\mu$ Ci [ $\alpha$ - $^{32}$ P]UTP; and 10  $\mu$ L virions. Reactions were incubated at room temperature for 1 hour and quenched by addition of 350  $\mu$ L TRIzol (Ambion). A corresponding gradient fraction from LRV1- parasites was included as a negative control in each set. RNA was purified using a Direct-Zol RNA miniprep kit (Zymo Research) and run on a native 1.2% agarose-TAE gel in a vertical gel apparatus (Owl Scientific) along with dsDNA sizing standards. The standards lane was excised and stained with ethidium bromide, while the radiolabeled products were detected by exposing an imaging plate for 24 hours and reading it with a FLA-5100

phosphoimager (Fuji). The amount of radiolabeled UTP in each RDRP product was quantified using the gel analysis tool in FIJI/ImageJ (67).

Equivalent regions from the negative control reaction were also integrated to calculate the background (Fig. 3).

To study inhibition of the viral RDRP by 2CMA-TP, varying amounts of the compound were added to standard RDRP reaction mixtures. 2CMA-TP was custom synthesized by Jena Bioscience, and its identity was confirmed using electrospray ionization with a Fourier-transform mass spectrometer in negative ion mode (Thermo Scientific). The stock concentration of 2CMA-TP was calculated by UV absorption at 260 nm, assuming that its molar extinction coefficient was identical to ATP. To measure the amount of 2CMA-TP which is non-specifically hydrolyzed over the course of an RDRP reaction, mock reactions were run using LRV1- gradient fractions, cold UTP, and 300  $\mu$ M 2CMA-TP. The 20- $\mu$ L reactions were diluted to 80  $\mu$ L with distilled water and immediately analyzed by HPLC as described below.

To estimate IC50 concentrations for each virion population and RDRP product, the quantified RDRP activity data was normalized to untreated and LRV- controls and fitted to logistic dose-response models. Fitting was performed and 95% confidence intervals were estimated using the “drc” package in the R statistical language (68).

**Measurement of parasite volumes.** Cultures of WT or GFP-expressing LRV1+ *Lgy* M4147 were seeded at 2 $\times$ 10<sup>5</sup> cells/mL and analyzed when they reached early, mid, or late log phase. From each sample, one aliquot was analyzed by light scattering on a flow-cytometer, while another was immobilized by treatment with 20 mM sodium azide and imaged by spinning-disk confocal microscopy (69). Cell volumes were calculated using a custom ImageJ script (67) (Supplemental Text 1). A standard curve relating forward scattering intensity to measured volume was developed from this data. Forward scattering intensity of parasites in our assay conditions was then measured and used to estimate the intracellular parasite volume.

**Nucleotide extraction from *Leishmania* parasites.** For each sample, 10<sup>8</sup> cells were collected by centrifugation at 2200  $\times$  g, 4 $^{\circ}$  C for 5



min, re-suspended in 1 mL ice-cold PBS and re-centrifuged. The cell pellet was gently re-suspended in 100  $\mu$ L ice-cold 0.5 $\times$ PBS plus 7 nmol dGTP as a recovery and elution standard. Cells were immediately lysed by rapidly re-suspending in 900  $\mu$ L ice-cold 5:4 acetonitrile:water mixture (70 ) and vortexing continuously for 5 min at 4°C. Insoluble debris was pelleted at 16,000  $\times$  g for 5 minutes and the clarified extract was transferred to a fresh tube. The solvent was removed by evaporation in a Savant SpeedVac concentrator (Thermo Scientific) with the heater off and the vacuum pump refrigeration on. Samples were re-suspended with 80  $\mu$ L distilled water, flash frozen, and stored at -80°C prior to HPLC analysis.

**HPLC separation of nucleotides.** Cell extracts were clarified by centrifuging for 2 min. at 16,000 $\times$ g. Nucleoside di- and tri-phosphates were separated by isocratic HPLC as previously described (71). Briefly, a 20  $\mu$ L aliquot of clarified extract was injected onto a Zorbax SB-C18 column (5  $\mu$ m particle size, 250 mm  $\times$  4.6 mm, Agilent) and eluted at 1 mL/min with 150 mM KH<sub>2</sub>PO<sub>4</sub> (pH 6.0); 4.2 mM tetrabutylammonium hydroxide; and 5.4% methanol. Eluting compounds were monitored by UV absorbance at 254 nm (Fig 6). The elution times of nucleoside triphosphates as well as 2CMA and 2CMA-TP were determined by running them individually. A minor peak present in each standard was presumed to represent the di-phosphate form of that

nucleoside. A mixture containing 200  $\mu$ M ATP, GTP, CTP, UTP, and dGTP was used periodically to assess column performance. Peak areas were integrated using Millenium32 software (Waters). Varying amounts of ATP, 2CMA-TP, and dGTP standards were used to construct a calibration curve relating peak areas to compound amounts. Peak areas varied linearly with nucleotide amounts injected down to 50 pmol.

**Gillespie simulation of LRV1 inhibition.** We modeled the effects of 2CMA treatment on LRV1 using the next-reaction modification to the Gillespie algorithm (a more detailed description as well as code is provided in Supplemental Text 2) (41). The parameters used to define the system were as follows: number of parasites, number of virions per parasite, parasite growth rate, and virus replication rate. All simulations were initialized with 1000 parasites and 16 virions per cell. Each cell and virus was assigned an amount of time remaining until it divided or replicated, respectively. Because these delay times were composed of an unknown but large number of elementary chemical reactions, they were selected from Gaussian distributions about the mean parasite division and virion replication times, rather than the Poisson distributions used for elementary reactions (41,52). At each step, the event with the shortest time remaining was selected, the simulation time incremented, and the model updated accordingly.

**Acknowledgements.** We thank E. Galburt for discussions and advice leading to the Gillespie simulation presented in this work, J. Henderson for assistance developing the HPLC protocol presented here, V. Schramm for providing immucillins, and E. Brettmann for providing GFP-expressing *Lgy*. We also thank A.C.M. Boon, C.E. Cameron, D. Goldberg, P. Olivo, C. Stallings, and N. Tolia for comments and/or suggestions. Supported by NIH grants R01AI029646 and R56AI099364 to SMB and Sigma-Aldrich Predoctoral and Sondra Schlesinger Graduate Student fellowships to JIR.

**Conflict of Interest:** The authors declare that they have no conflicts of interest with the contents of this article.

**Author contributions:** JIR and SMB designed the study; JIR performed the experiments; and JIR and SMB analyzed the data, and wrote the paper.

## REFERENCES

1. Alvar, J., Velez, I. D., Bern, C., Herrero, M., Desjeux, P., Cano, J., Jannin, J., den Boer, M., and Team, W. H. O. L. C. (2012) Leishmaniasis worldwide and global estimates of its incidence. *PLoS One* **7**, e35671
2. Volf, P., and Myskova, J. (2007) Sand flies and *Leishmania*: specific versus permissive vectors. *Trends Parasitol* **23**, 91-92
3. Pigott, D. M., Bhatt, S., Golding, N., Duda, K. A., Battle, K. E., Brady, O. J., Messina, J. P., Balard, Y., Bastien, P., Pratlong, F., Brownstein, J. S., Freifeld, C. C., Mekaru, S. R., Gething, P. W., George, D. B., Myers, M. F., Reithinger, R., and Hay, S. I. (2014) Global distribution maps of the leishmaniasis. *Elife* **3**
4. Banuls, A.-L., Bastien, P., Pomares, C., Arevalo, J., Fisa, R., and Hide, M. (2011) Clinical pleiomorphism in human leishmaniasis, with special mention of asymptomatic infection. *Clinical Microbiology and Infection* **17**, 1451-1461
5. Hartley, M. A., Drexler, S., Ronet, C., Beverley, S. M., and Fasel, N. (2014) The immunological, environmental, and phylogenetic perpetrators of metastatic leishmaniasis. *Trends Parasitol* **30**, 412-422
6. Kaye, P., and Scott, P. (2011) Leishmaniasis: complexity at the host-pathogen interface. *Nat Rev Microbiol* **9**, 604-615
7. Widmer, G., Comeau, A. M., Furlong, D. B., Wirth, D. F., and Patterson, J. L. (1989) Characterization of a RNA virus from the parasite *Leishmania*. *Proc Natl Acad Sci U S A* **86**, 5979-5982
8. Tarr, P. I., Aline, J., RF, Smiley, B. L., Scholler, J., Keithly, J., and Stuart, K. (1988) LR1: a candidate RNA virus of *Leishmania*. *Proc Natl Acad Sci U S A* **85**, 9572-9575
9. Ginouvès, M., Simon, S., Bourreau, E., Lacoste, V., Ronet, C., Couppez, P., Nacher, M., Demar, M., and Prévot, G. (2015) Prevalence and Distribution of *Leishmania* RNA Virus 1 in *Leishmania* Parasites from French Guiana. *Am J Trop Med Hyg*
10. Widmer, G., and Dooley, S. (1995) Phylogenetic analysis of *Leishmania* RNA virus and *Leishmania* suggests ancient virus-parasite association. *Nucleic Acids Res* **23**, 2300-2304
11. Armstrong, T. C., Keenan, M. C., Widmer, G., and Patterson, J. L. (1993) Successful transient introduction of *Leishmania* RNA virus into a virally infected and an uninfected strain of *Leishmania*. *Proceedings of the National Academy of Sciences* **90**, 1736-1740
12. Ives, A., Ronet, C., Prevel, F., Ruzzante, G., Fuertes-Marraco, S., Schutz, F., Zangger, H., Revaz-Breton, M., Lye, L. F., Hickerson, S. M., Beverley, S. M., Acha-Orbea, H., Launois, P., Fasel, N., and Masina, S. (2011) *Leishmania* RNA virus controls the severity of mucocutaneous leishmaniasis. *Science* **331**, 775-778

13. Hartley, M.-A., Bourreau, E., Rossi, M., Castiglioni, P., Eren, R. O., Prevel, F., Couppié, P., Hickerson, S. M., Launois, P., and Beverley, S. M. (2016) *Leishmanavirus*-dependent metastatic leishmaniasis is prevented by blocking IL-17A. *PLoS Pathog* **12**, e1005852
14. Brettmann, E. A., Shaik, J. S., Zangger, H., Lye, L. F., Kuhlmann, F. M., Akopyants, N. S., Oschwald, D. M., Owens, K. L., Hickerson, S. M., Ronet, C., Fasel, N., and Beverley, S. M. (2016) Tilting the balance between RNA interference and replication eradicates *Leishmania* RNA virus 1 and mitigates the inflammatory response. *Proc Natl Acad Sci U S A* **113**, 11998-12005
15. Kuhlmann, F. M., Robinson, J. I., Bluemling, G. R., Ronet, C., Fasel, N., and Beverley, S. M. (2017) Antiviral screening identifies adenosine analogs targeting the endogenous dsRNA *Leishmania* RNA virus 1 (LRV1) pathogenicity factor. *Proceedings of the National Academy of Sciences* **114**, E811-E819
16. Ro, Y. T., Scheffter, S. M., and Patterson, J. L. (1997) Hygromycin B resistance mediates elimination of *Leishmania* virus from persistently infected parasites. *J Virol* **71**, 8991-8998
17. Cantanhede, L. M., da Silva Junior, C. F., Ito, M. M., Felipin, K. P., Nicolette, R., Salcedo, J. M., Porrozzi, R., Cupolillo, E., and Ferreira Rde, G. (2015) Further Evidence of an Association between the Presence of *Leishmania* RNA Virus 1 and the Mucosal Manifestations in Tegumentary Leishmaniasis Patients. *PLoS Negl Trop Dis* **9**, e0004079
18. Bourreau, E., Ginouves, M., Prevot, G., Hartley, M. A., Gangneux, J. P., Robert-Gangneux, F., Dufour, J., Sainte-Marie, D., Bertolotti, A., Pratlong, F., Martin, R., Schutz, F., Couppe, P., Fasel, N., and Ronet, C. (2016) Presence of *Leishmania* RNA Virus 1 in *Leishmania guyanensis* Increases the Risk of First-Line Treatment Failure and Symptomatic Relapse. *J Infect Dis* **213**, 105-111
19. Ito, M. M., Catanhede, L. M., Katsuragawa, T. H., da Silva Junior, C. F., Camargo, L. M., Mattos Rde, G., and Vilallobos-Salcedo, J. M. (2015) Correlation between presence of *Leishmania* RNA virus 1 and clinical characteristics of nasal mucosal leishmaniasis. *Braz J Otorhinolaryngol* **81**, 533-540
20. Adaui, V., Lye, L. F., Akopyants, N. S., Zimic, M., Llanos-Cuentas, A., Garcia, L., Maes, I., De Doncker, S., Dobson, D. E., Arevalo, J., Dujardin, J. C., and Beverley, S. M. (2015) Association of the Endobiont Double-Stranded RNA Virus LRV1 With Treatment Failure for Human Leishmaniasis Caused by *Leishmania braziliensis* in Peru and Bolivia. *J Infect Dis*
21. Pereira, L. d. O. R., Maretti-Mira, A. C., Rodrigues, K. M., Lima, R. B., Oliveira-Neto, M. P. d., Cupolillo, E., Pirmez, C., and Oliveira, M. P. d. (2013) Severity of tegumentary leishmaniasis is not exclusively associated with *Leishmania* RNA virus 1 infection in Brazil. *Memórias do Instituto Oswaldo Cruz* **108**, 665-667
22. Castellucci, L. C., Almeida, L. F., Jamieson, S. E., Fakiola, M., Carvalho, E. M., and Blackwell, J. M. (2014) Host genetic factors in American cutaneous leishmaniasis: a critical appraisal of studies conducted in an endemic area of Brazil. *Mem Inst Oswaldo Cruz* **109**, 279-288
23. Schriefer, A., Wilson, M. E., and Carvalho, E. M. (2008) Recent developments leading toward a paradigm switch in the diagnostic and therapeutic approach to human leishmaniasis. *Curr Opin Infect Dis* **21**, 483-488
24. Rossi, M., Castiglioni, P., Hartley, M. A., Eren, R. O., Prevel, F., Desponds, C., Utzschneider, D. T., Zehn, D., Cusi, M. G., Kuhlmann, F. M., Beverley, S. M., Ronet, C.,

- and Fasel, N. (2017) Type I interferons induced by endogenous or exogenous viral infections promote metastasis and relapse of leishmaniasis. *Proc Natl Acad Sci U S A* **114**, 4987-4992
25. Parmentier, L., Cusini, A., Muller, N., Zangger, H., Hartley, M. A., Desponds, C., Castiglioni, P., Dubach, P., Ronet, C., Beverley, S. M., and Fasel, N. (2016) Severe Cutaneous Leishmaniasis in a Human Immunodeficiency Virus Patient Coinfected with *Leishmania braziliensis* and Its Endosymbiotic Virus. *Am J Trop Med Hyg* **94**, 840-843
26. Eren, R. O., Reverte, M., Rossi, M., Hartley, M. A., Castiglioni, P., Prevel, F., Martin, R., Desponds, C., Lye, L. F., Drexler, S. K., Reith, W., Beverley, S. M., Ronet, C., and Fasel, N. (2016) Mammalian Innate Immune Response to a *Leishmania*-Resident RNA Virus Increases Macrophage Survival to Promote Parasite Persistence. *Cell Host Microbe* **20**, 318-328
27. Stuart, K. D., Weeks, R., Guilbride, L., and Myler, P. J. (1992) Molecular organization of *Leishmania* RNA virus 1. *Proc Natl Acad Sci U S A* **89**, 8596-8600
28. Lee, S. E., Suh, J. M., Scheffter, S., Patterson, J. L., and Chung, I. K. (1996) Identification of a Ribosomal Frameshift in *Leishmania* RNA Virus 1-4. *The Journal of Biochemistry* **120**, 22-25
29. Kim, S., Choi, J., Park, M., Jeong, S., Han, K., and Kim, H. (2005) Identification of the +1 ribosomal frameshifting site of LRV1-4 by mutational analysis. *Arch Pharm Res* **28**, 956-962
30. Cadd, T. L., and Patterson, J. L. (1994) Synthesis of viruslike particles by expression of the putative capsid protein of *Leishmania* RNA virus in a recombinant baculovirus expression system. *J Virol* **68**, 358-365
31. Castiglioni, P., Hartley, M.-A., Rossi, M., Prevel, F., Desponds, C., Utzschneider, D. T., Eren, R.-O., Zangger, H., Brunner, L., and Collin, N. (2017) Exacerbated leishmaniasis caused by a viral endosymbiont can be prevented by immunization with its viral capsid. *PLoS Neglected Tropical Diseases* **11**, e0005240
32. Boitz, J. M., and Ullman, B. (2013) Adenine and adenosine salvage in *Leishmania donovani*. *Mol Biochem Parasitol* **190**, 51-55
33. Widmer, G., Keenan, M. C., and Patterson, J. L. (1990) RNA-Polymerase Activity Is Associated with Viral Particles Isolated from *Leishmania Braziliensis* subsp. *guyanensis*. *Journal of Virology* **64**, 3712-3715
34. Oliver, S. G., Mc, C. S., Holm, C., Sutherland, P. A., McLaughlin, C. S., and Cox, B. S. (1977) Biochemical and physiological studies of the yeast virus-like particle. *J Bacteriol* **130**, 1303-1309
35. Adler, J., Wood, H. A., and Bozarth, R. F. (1976) Virus-like particles from killer, neutral, and sensitive strains of *Saccharomyces cerevisiae*. *J Virol* **17**, 472-476
36. Esteban, R., and Wickner, R. B. (1986) Three different M1 RNA-containing viruslike particle types in *Saccharomyces cerevisiae*: *in vitro* M1 double-stranded RNA synthesis. *Mol Cell Biol* **6**, 1552-1561
37. Traut, T. W. (1994) Physiological concentrations of purines and pyrimidines. *Mol Cell Biochem* **140**, 1-22
38. Sacks, D. L., and Perkins, P. V. (1984) Identification of an infective stage of *Leishmania* promastigotes. *Science* **223**, 1417-1419
39. Kong, X. B., Zhu, Q. Y., Vidal, P. M., Watanabe, K. A., Polsky, B., Armstrong, D., Ostrander, M., Lang, S. A., Jr., Muchmore, E., and Chou, T. C. (1992) Comparisons of



- anti-human immunodeficiency virus activities, cellular transport, and plasma and intracellular pharmacokinetics of 3'-fluoro-3'-deoxythymidine and 3'-azido-3'-deoxythymidine. *Antimicrob Agents Chemother* **36**, 808-818
40. Eldrup, A. B., Prhavc, M., Brooks, J., Bhat, B., Prakash, T. P., Song, Q., Bera, S., Bhat, N., Dande, P., Cook, P. D., Bennett, C. F., Carroll, S. S., Ball, R. G., Bosserman, M., Burlein, C., Colwell, L. F., Fay, J. F., Flores, O. A., Getty, K., LaFemina, R. L., Leone, J., MacCoss, M., McMasters, D. R., Tomassini, J. E., Von Langen, D., Wolanski, B., and Olsen, D. B. (2004) Structure-activity relationship of heterobase-modified 2'-C-methyl ribonucleosides as inhibitors of hepatitis C virus RNA replication. *J Med Chem* **47**, 5284-5297
41. Gibson, M. A., and Bruck, J. (2000) Efficient exact stochastic simulation of chemical systems with many species and many channels. *J Phys Chem A* **104**, 1876-1889
42. Rankin, J., JT, Eppes, S. B., Antczak, J. B., and Joklik, W. K. (1989) Studies on the mechanism of the antiviral activity of ribavirin against reovirus. *Virology* **168**, 147-158
43. Furuta, Y., Takahashi, K., Kuno-Maekawa, M., Sangawa, H., Uehara, S., Kozaki, K., Nomura, N., Egawa, H., and Shiraki, K. (2005) Mechanism of action of T-705 against influenza virus. *Antimicrob Agents Chemother* **49**, 981-986
44. Murakami, E., Bao, H., Ramesh, M., McBrayer, T. R., Whitaker, T., Micolochick Steuer, H. M., Schinazi, R. F., Stuyver, L. J., Obikhod, A., Otto, M. J., and Furman, P. A. (2007) Mechanism of activation of beta-D-2'-deoxy-2'-fluoro-2'-c-methylcytidine and inhibition of hepatitis C virus NS5B RNA polymerase. *Antimicrob Agents Chemother* **51**, 503-509
45. Fernandez-Larsson, R., O'Connell, K., Koumans, E., and Patterson, J. L. (1989) Molecular analysis of the inhibitory effect of phosphorylated ribavirin on the vesicular stomatitis virus *in vitro* polymerase reaction. *Antimicrob Agents Chemother* **33**, 1668-1673
46. Carroll, S. S., Tomassini, J. E., Bosserman, M., Getty, K., Stahlhut, M. W., Eldrup, A. B., Bhat, B., Hall, D., Simcoe, A. L., LaFemina, R., Rutkowski, C. A., Wolanski, B., Yang, Z., Migliaccio, G., De Francesco, R., Kuo, L. C., MacCoss, M., and Olsen, D. B. (2003) Inhibition of hepatitis C virus RNA replication by 2'-modified nucleoside analogs. *The Journal of biological chemistry* **278**, 11979-11984
47. Datta, A. K., Bhaumik, D., and Chatterjee, R. (1987) Isolation and characterization of adenosine kinase from *Leishmania donovani*. *The Journal of biological chemistry* **262**, 5515-5521
48. Bhaumik, D., and Datta, A. K. (1988) Reaction kinetics and inhibition of adenosine kinase from *Leishmania donovani*. *Mol Biochem Parasitol* **28**, 181-187
49. McGuigan, C., Gilles, A., Madala, K., Aljarah, M., Holl, S., Jones, S., Vernachio, J., Hutchins, J., Ames, B., Bryant, K. D., Gorovits, E., Ganguly, B., Hunley, D., Hall, A., Kolykhalov, A., Liu, Y., Muhammad, J., Raja, N., Walters, R., Wang, J., Chamberlain, S., and Henson, G. (2010) Phosphoramidate ProTides of 2'-C-methylguanosine as highly potent inhibitors of hepatitis C virus. Study of their *in vitro* and *in vivo* properties. *J Med Chem* **53**, 4949-4957
50. Rainey, P., and Santi, D. V. (1983) Metabolism and mechanism of action of formycin B in *Leishmania*. *Proc Natl Acad Sci U S A* **80**, 288-292
51. LaFon, S., Nelson, D., Berens, R., and Marr, J. (1985) Inosine analogs. Their metabolism in mouse L cells and in *Leishmania donovani*. *Journal of Biological Chemistry* **260**, 9660-9665

52. Gillespie, D. (1976) Stochastic simulation of chemical processes. *J. Comput. Phys* **22**, 403
53. Ro, Y., and Patterson, J. L. (2003) Mutational Analysis of an Essential RNA Stem-loop Structure in a Minimal RNA Substrate Specifically Cleaved by *Leishmania* RNA Virus 1-4 (LRV1-4) Capsid Endoribonuclease. *Journal Of Microbiology (Seoul)* **41**, 239-247
54. Ro, Y. T., and Patterson, J. L. (2000) Identification of the minimal essential RNA sequences responsible for site-specific targeting of the *Leishmania* RNA virus 1-4 capsid endoribonuclease. *J Virol* **74**, 130-138
55. Ro, Y. T., Kim, E. J., Lee, H. I., Saiz, M., Carrion, J., Ricardo, and Patterson, J. L. (2004) Evidence that the fully assembled capsid of *Leishmania* RNA virus 1-4 possesses catalytically active endoribonuclease activity. *Exp Mol Med* **36**, 145-156
56. MacBeth, K. J., Ro, Y. T., Gehrke, L., and Patterson, J. L. (1997) Cleavage site mapping and substrate-specificity of *Leishmaniovirus* 2-1 capsid endoribonuclease activity. *J Biochem* **122**, 193-200
57. MacBeth, K. J., and Patterson, J. L. (1995) Single-site cleavage in the 5'-untranslated region of *Leishmaniovirus* RNA is mediated by the viral capsid protein. *Proc Natl Acad Sci U S A* **92**, 8994-8998
58. Olsen, D. B., Eldrup, A. B., Bartholomew, L., Bhat, B., Bosserman, M. R., Ceccacci, A., Colwell, L. F., Fay, J. F., Flores, O. A., Getty, K. L., Grobler, J. A., LaFemina, R. L., Markel, E. J., Migliaccio, G., Prhac, M., Stahlhut, M. W., Tomassini, J. E., MacCoss, M., Hazuda, D. J., and Carroll, S. S. (2004) A 7-deaza-adenosine analog is a potent and selective inhibitor of hepatitis C virus replication with excellent pharmacokinetic properties. *Antimicrob Agents Chemother* **48**, 3944-3953
59. Hercík, K., Kozak, J., Šála, M., Dejmek, M., Hřebabecký, H., Zborníková, E., Smola, M., Ruzek, D., Nencka, R., and Boura, E. (2017) Adenosine triphosphate analogs can efficiently inhibit the Zika virus RNA-dependent RNA polymerase. *Antiviral Research* **137**, 131-133
60. Zmurko, J., Marques, R. E., Schols, D., Verbeken, E., Kaptein, S. J., and Neyts, J. (2016) The Viral Polymerase Inhibitor 7-Deaza-2'-C-Methyladenosine Is a Potent Inhibitor of *In Vitro* Zika Virus Replication and Delays Disease Progression in a Robust Mouse Infection Model. *PLoS Negl Trop Dis* **10**, e0004695
61. Shi, W., Schramm, V. L., and Almo, S. C. (1999) Nucleoside hydrolase from *Leishmania major*. Cloning, expression, catalytic properties, transition state inhibitors, and the 2.5-Å crystal structure. *The Journal of biological chemistry* **274**, 21114-21120
62. Freitas, E. O., Nico, D., Guan, R., Meyer-Fernandes, J. R., Clinch, K., Evans, G. B., Tyler, P. C., Schramm, V. L., and Palatnik-de-Sousa, C. B. (2015) Immucillins Impair *Leishmania (L.) infantum chagasi* and *Leishmania (L.) amazonensis* Multiplication *In Vitro*. *PLoS One* **10**, e0124183
63. Lye, L. F., Owens, K., Shi, H., Murta, S. M., Vieira, A. C., Turco, S. J., Tschudi, C., Ullu, E., and Beverley, S. M. (2010) Retention and loss of RNA interference pathways in trypanosomatid protozoans. *PLoS Pathog* **6**, e1001161
64. Armstrong, T. C., and Patterson, J. L. (1994) Cultivation of *Leishmania braziliensis* in an economical serum-free medium containing human urine. *J Parasitol* **80**, 1030-1032
65. Zangger, H., Ronet, C., Desponds, C., Kuhlmann, F. M., Robinson, J., Hartley, M. A., Prevel, F., Castiglioni, P., Pratlong, F., Bastien, P., Muller, N., Parmentier, L., Saravia, N.

- G., Beverley, S. M., and Fasel, N. (2013) Detection of *Leishmania* RNA virus in *Leishmania* parasites. *PLoS Negl Trop Dis* **7**, e2006
66. Scotti, P. D. (1985) The estimation of virus density in isopycnic cesium chloride gradients. *J Virol Methods* **12**, 149-160
67. Schindelin, J., Arganda-Carreras, I., Frise, E., Kaynig, V., Longair, M., Pietzsch, T., Preibisch, S., Rueden, C., Saalfeld, S., Schmid, B., Tinevez, J. Y., White, D. J., Hartenstein, V., Eliceiri, K., Tomancak, P., and Cardona, A. (2012) Fiji: an open-source platform for biological-image analysis. *Nat Methods* **9**, 676-682
68. Ritz, C., Baty, F., Streibig, J. C., and Gerhard, D. (2015) Dose-Response Analysis Using R. *PLOS ONE* **10**, e0146021
69. Ellenberger, T. E., and Beverley, S. M. (1987) Biochemistry and regulation of folate and methotrexate transport in *Leishmania major*. *Journal of Biological Chemistry* **262**, 10053-10058
70. Au, J. L., Su, M. H., and Wientjes, M. G. (1989) Extraction of intracellular nucleosides and nucleotides with acetonitrile. *Clin Chem* **35**, 48-51
71. Moal, J., Le Coz, J., Samain, J., and Daniel, J. (1989) Nucleotides in bivalves: extraction and analysis by high-performance liquid chromatography (HPLC). *Comparative Biochemistry and Physiology Part B: Comparative Biochemistry* **93**, 307-316
72. Fox, J., and Weisberg, S. (2011) *An R Companion to Applied Regression*, 2nd ed., SAGE Publications

**Table 1. Effect of 2CMA-TP on *Lgy* LRV1 RDRP activity**

| <b>Product</b> | <b>LRV1 fraction IC50 (μM)</b> |                                 |                               |
|----------------|--------------------------------|---------------------------------|-------------------------------|
|                | <b>Low Density<br/>(n=3)</b>   | <b>Medium Density<br/>(n=3)</b> | <b>High Density<br/>(n=4)</b> |
| Full-Length    | 150 (90 – 210)                 | 250 (100 – 400)                 | 420 (310 – 540)               |
| Small          | 250 (160 – 330)                | 640 (300 – 980)                 | 910 (620 – 1200)              |

IC50 values and 95% confidence intervals for the inhibition of full-length and small RDRP product synthesis were calculated by simultaneously fitting RDRP inhibition data for each RDRP product and virion population to logistic dose-response curves (*drc* package in R (68)). Because the RDRP activity was normalized with no activity set as zero, we fixed the minimum parameter to zero. The influence of RDRP product type and virion population on the IC50s was estimated by fitting dose-response curves while combining all RDRP products or virion populations. Comparing these sub-models to the full model using ANOVA (68) showed that virion type contributes significantly to the goodness-of-fit ( $p < 0.001$ ), while the RDRP product contribution was only borderline significant ( $p < 0.05$ ). (72)



## Figure legends.

**Figure 1. *Leishmania* LRV1 replication cycle and inhibitors. Panel A.** A schematic depiction of the LRV1 lifecycle. RNAs are indicated in color (+ strand red, -strand blue); the dsRNA genome within the mature virion is shown as straight lines, while ssRNAs are shown as jagged lines. The viral RDRP (black trapezoid) is shown fused to a capsid monomer (white circle), as the RDRP is generated through frame shift translation (27-29). **Panel B.** Chemical structures of adenosine, 2'-C-methyladenosine, and 7-deaza-2'-C-methyladenosine.

**Figure 2. Distribution of viral capsid protein across a CsCl density gradient.** Clarified parasite lysates were separated on a CsCl density gradient and the relative amounts of viral capsid protein in each fraction were measured (black triangles; see “Experimental Procedures”). The density of each fraction (gray circles) was measured with an Abbe refractometer. Data for one representative gradient are shown out of the 7 performed. The low, medium and high density “peak” fractions (LD, MD and HD) taken for RDRP assays, are labeled.

**Figure 3. Radiolabeled RNAs produced by purified *Lgy* LRV1 RDRP *in vitro*. Panel A.** RDRP activity in LD, MD, and HD fractions (Fig. 2) was assayed by [ $\alpha$ - $^{32}$ P]UTP incorporation, as described in “Experimental Procedures.” Radiolabeled RNAs were run along-side pure [ $\alpha$ - $^{32}$ P]UTP on a native agarose gel. The full-length and small RDRP products are labeled for reference. **Panel B.** RDRP reactions were performed in the presence of 0, 10, 30, 100, 300, or 600  $\mu$ M 2CMA-TP. As a negative control, the RDRP reaction was run using a mock HD fraction isolated from LRV1- *Lgy* parasites. A representative titration using the HD fraction is shown here out of the 4 HD fraction titrations performed.

**Figure 4. 2CMA-TP Inhibition of RDRP activity of purified *Lgy* LRV1 virions.** The amounts of full-length or small RDRP products were quantified and then normalized to the amount of product formed in the absence of 2CMA-TP. The averages and SDs (calculated with Microsoft Excel) from three LD virion titrations (dotted line) and four HD virion titrations (solid line) are shown. **Panel A.** Plot of full-length RDRP products. **Panel B.** Plot of small RDRP products. MD virions showed intermediate profiles<sup>2</sup> (Table 1).

**Figure 5. Specificity of *Lgy* RDRP inhibition by 2CMA-TP relative to 2CMA and dATP.** RDRP reactions were performed for 1 hour in the presence of 1 mM 2CMA, 600  $\mu$ M dATP, or 600  $\mu$ M 2CMA-TP. The amount of full-length (top panel) and small products (bottom panel) were measured and normalized to untreated control reactions. Individual values are shown for two experiments (with 1 or 2 technical replicas) and the means are marked with horizontal lines.

**Figure 6. *Lgy* M4147 LRV1+ parasites synthesize 2CMA-TP. Panel A.** Standard mixture of dGTP, ATP, and 2CMA-TP establishing the HPLC elution profile of 2CMA-TP relative to dGTP, the exogenous internal standard (endogenous cellular dGTP concentrations are well below the limit of detection). The small peak eluting between dGTP and ATP is presumed to be 2CMA-DP. **Panel B.** Detection of 2CMA-TP in *Lgy* incubated with 10  $\mu$ M 2CMA for 20 hours (blue line). An extract from cells grown without drug (gray line) is provided for comparison. In order to correct for variation in extraction efficiency and HPLC elution times, *Lgy* samples had 7 nmol dGTP spiked in immediately prior to extraction.

**Figure 7. *L. guyanensis* parasites accumulate high levels of 2CMA-TP.** Intracellular 2CMA-TP was extracted and quantified by HPLC (Fig. 6; Fig. S2) and its concentration was calculated using the measured cell volume of 23 fL under these conditions (Experimental Procedures). Each

replicate (grey circles) was obtained from a separate 5-mL culture grown in Schneider's medium. Averages and standard deviations (black diamonds; calculated in Microsoft Excel) are also plotted for each time point or condition. For reference, the minimum RDRP IC<sub>50</sub> is marked on each graph (green dashed line). **Panel A.** 2CMA-TP accumulation in parasites measured over time. *Lgy* parasites were incubated in 10  $\mu$ M 2CMA for the indicated periods and 10<sup>8</sup> cells were harvested for analysis. This experiment was performed twice. Intracellular 2CMA-TP concentrations at equilibrium after 20 hours of incubation with 10  $\mu$ M 2CMA are also plotted (grey triangles). **Panel B.** Steady-state concentrations of 2CMA-TP vary with 2CMA dose. *Lgy* parasites were grown for 20 hours in the presence of the indicated concentrations of external 2CMA prior to analysis. This experiment was repeated four times. The fold-concentration of intracellular 2CMA-TP was calculated relative to extracellular 2CMA dose (blue diamonds). For reference, the EC<sub>50</sub> for LRV1 inhibition in parasites is marked on the X axis (black arrow). **Panel C.** Retention of 2CMA-TP following removal of 2CMA. LRV1+ *Lgy* M4147 parasites were incubated for 20 hours in the presence of 10  $\mu$ M 2CMA; at that time, cells were harvested, washed, and resuspended in drug-free medium. Intracellular 2CMA-TP levels were determined after incubation for the indicated times. To correct for 2CMA-TP dilution due to parasite replication, 2CMA-TP concentrations were multiplied by the fold population growth since 2CMA removal (about 1.4-fold over the course of the experiment). This experiment was repeated twice using two independent cultures per time point (n=4; grey circles). Averages and standard deviations (black diamonds; calculated in Microsoft Excel) are also plotted for each time point. Since some time points were collected at slightly varying times, these were averaged for plotting in the figure.

**Figure 8. Gillespie simulation of LRV1 loss during 2CMA treatment.** Plots of simulated, theoretical and experimental results showing the number of LRV1 virions per cell as a function of cell doubling are shown. Gillespie simulations performed assuming relative inhibition of LRV1 and parasite replication ( $R_V:R_P$ ) to be between 1:1 and 1:4 are depicted by blue lines. These lines represent averages and standard deviations of 6 identical simulations (Excel). A theoretical plot is shown (gray dotted line) for total inhibition of viral replication with ideal 2-fold viral dilution per population doubling time. Two experimental data sets from Kuhlmann *et al.* (15) measuring LRV1 loss during 2CMA treatment are shown as black dashed lines.



Figure 1

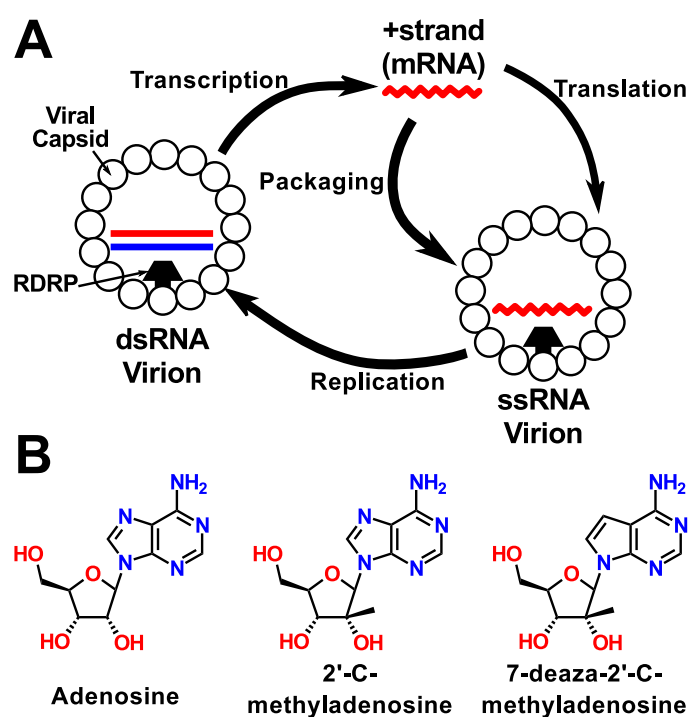

Figure 2

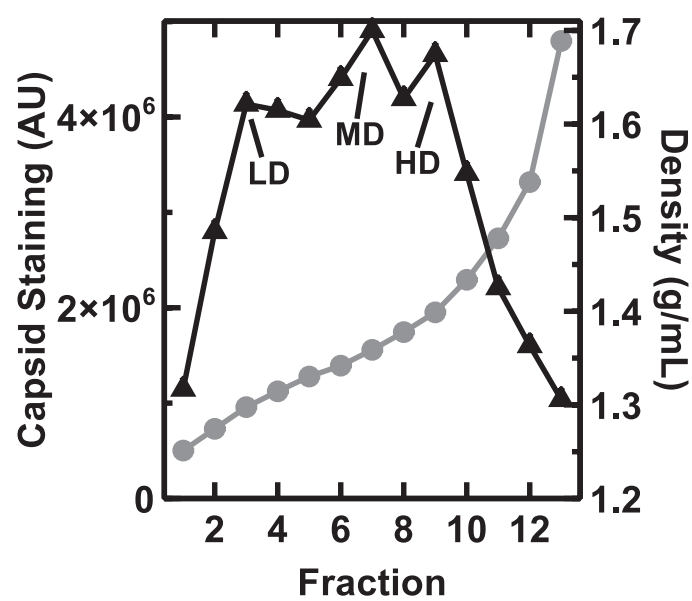

Figure 3

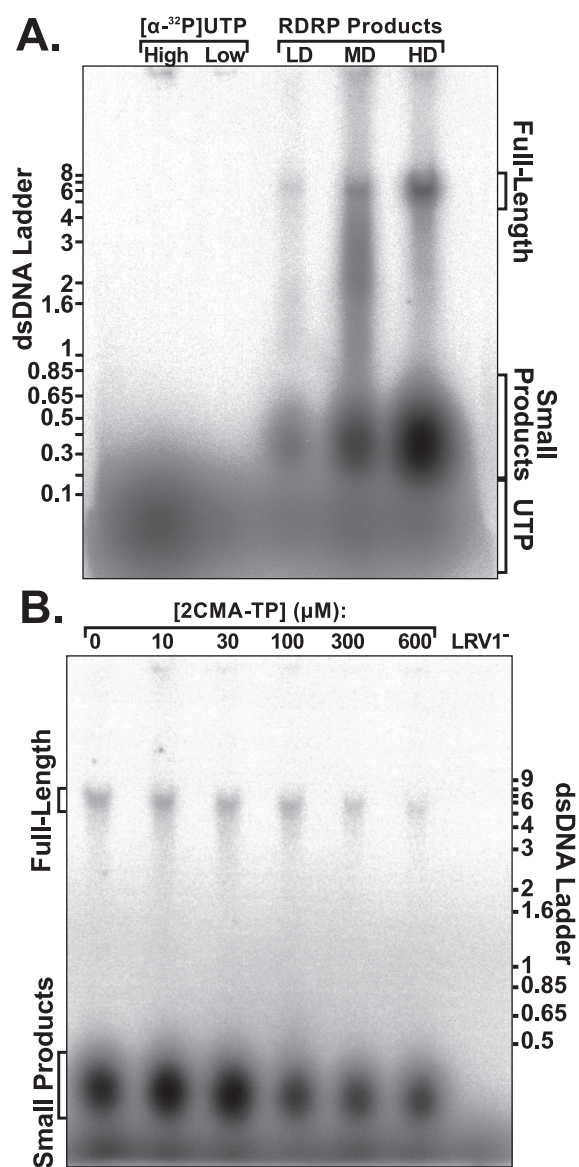

Figure 4

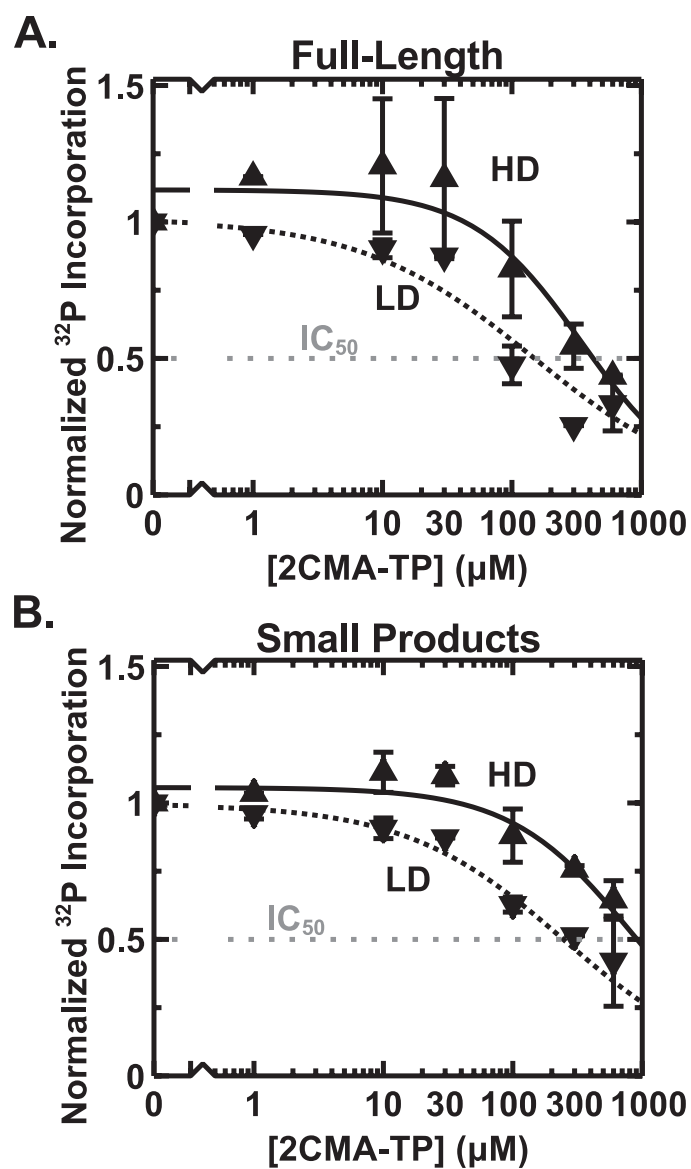

Figure 5

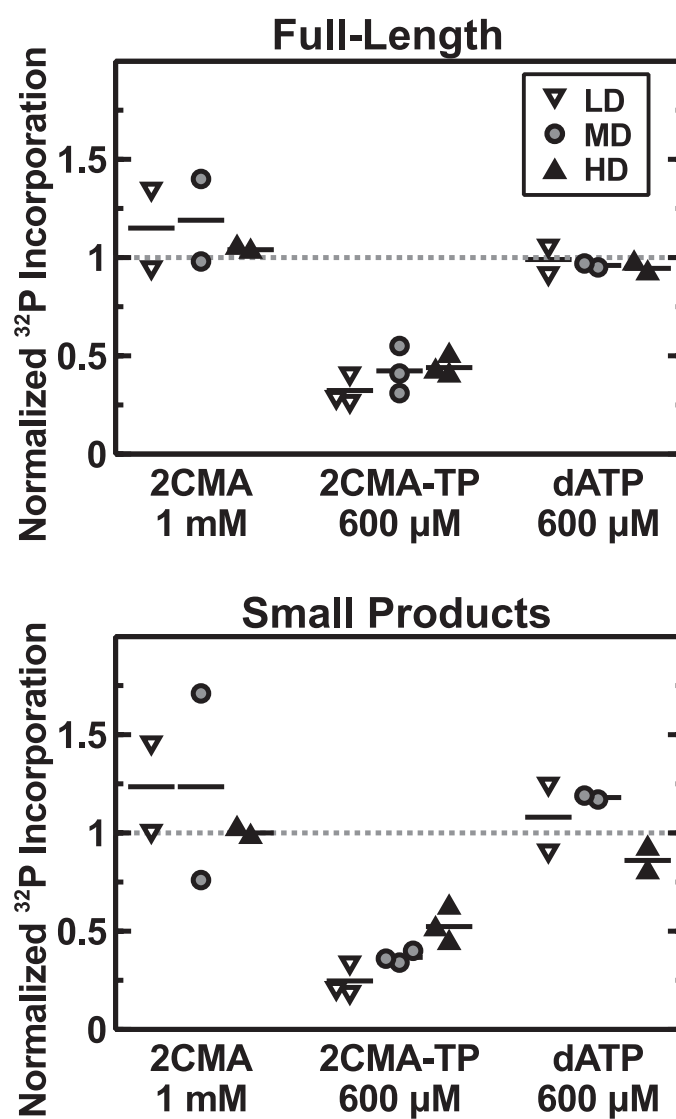



Figure 6

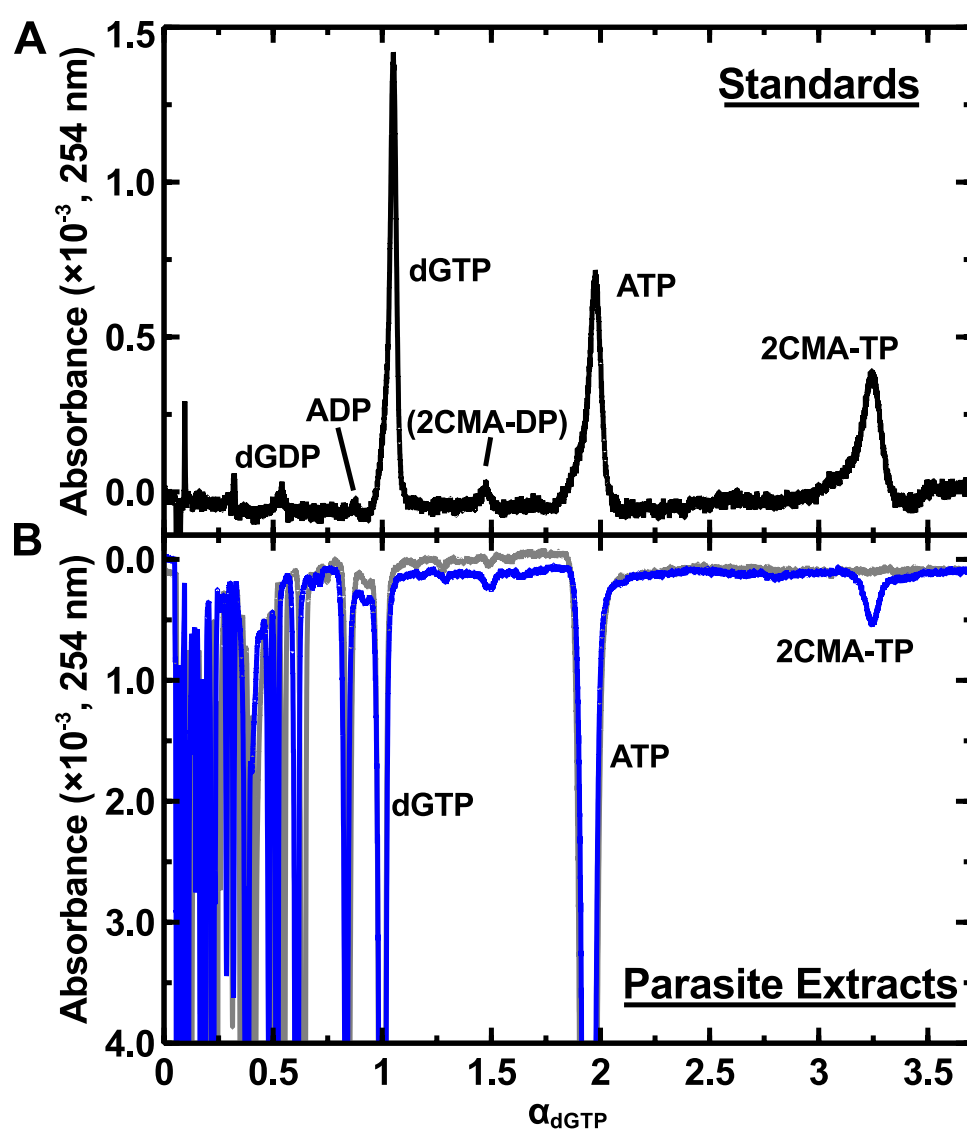

Figure 7

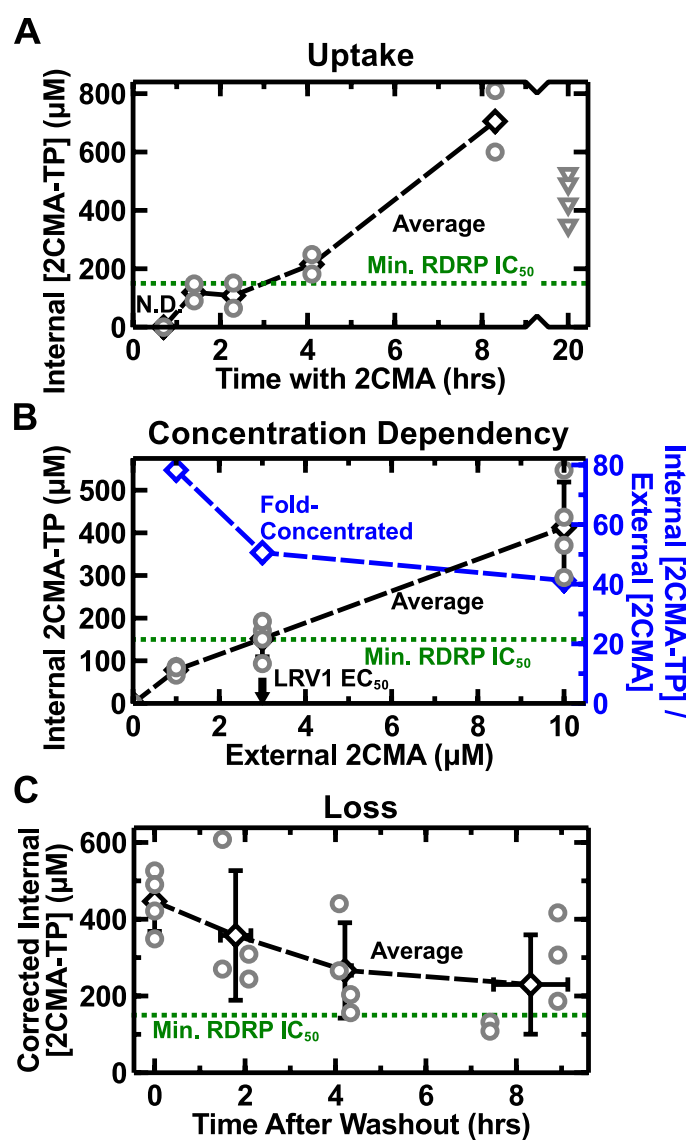

Figure 8

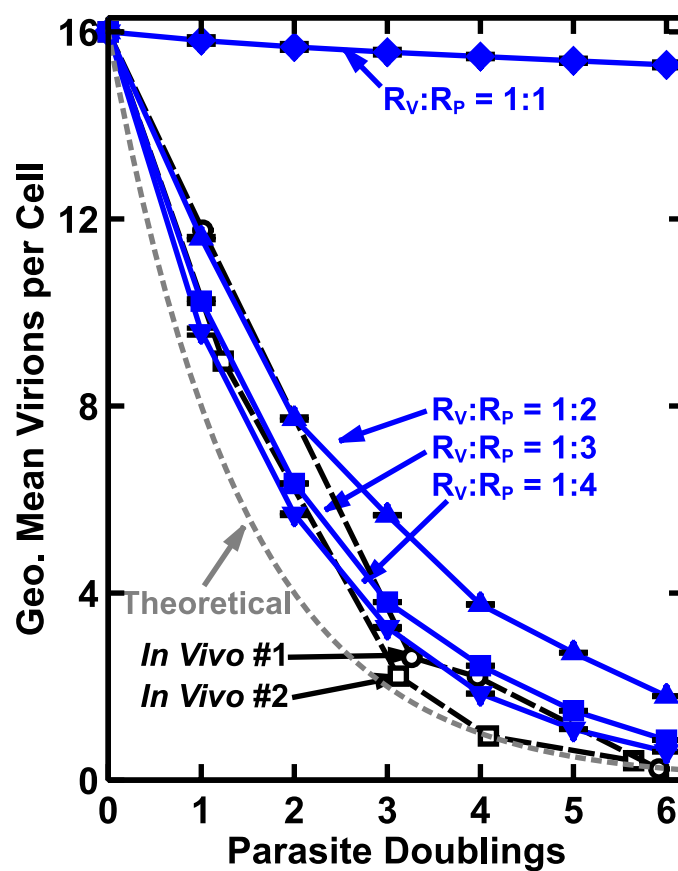

Source: http://biorxiv.org/content/10.1101/261172v1.full.pdf
